# Supplementary material
Source: MDPI journal article supplement (https://www.mdpi.com/1422-0067/20/13/3238)
Supplement: s1 [file s1]

Archive with 3 entries (3 files):
- Supplementary Table S1-correct 20200314.pdf
- Supplementary Figure S1-correct 20200314.pdf
- Supplementary Figure S2.pdf
