# Supplementary material for: Antiproliferation for Breast Cancer Cells by Ethyl Acetate Extract of Nepenthes thorellii x (ventricosa x maxima)
Source: MDPI journal article supplement (doi:10.3390/ijms20133238), 2019-07-01
Supplement: s1 [file s1]

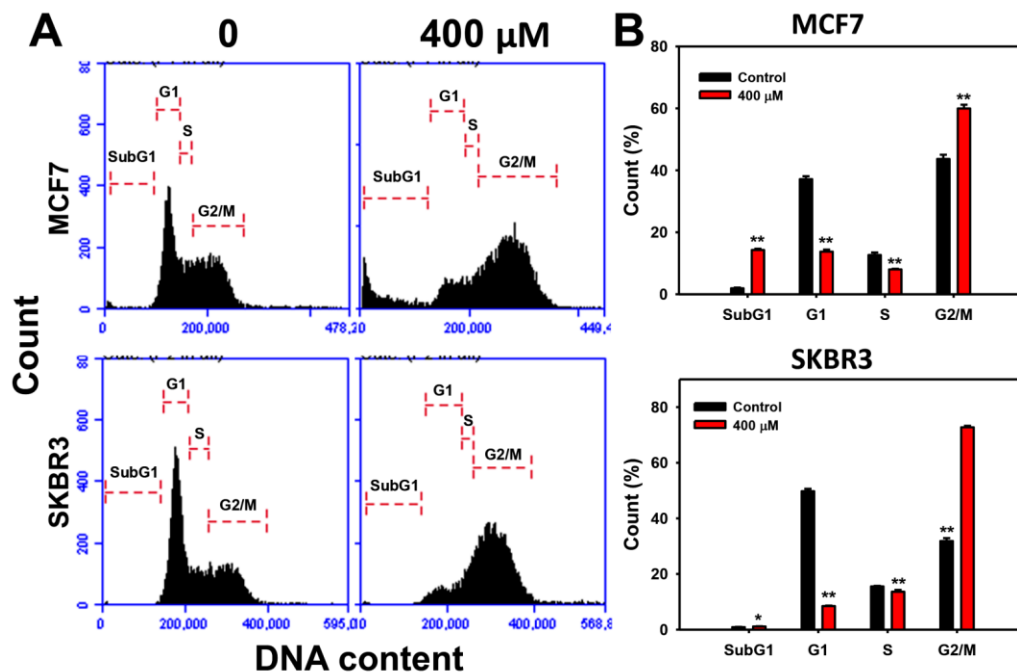

**Figure 2S-AB.** Positive control patterns for subG1 accumulation or G2/M arrest in cell cycle analysis. (A) Flow cytometry pattern. (B) Statistics. Cells (MCF7 and SKBR3) were treated with  $\text{H}_2\text{O}_2$  (400  $\mu\text{M}$ ) for 24 h. \* and \*\* indicate  $P < 0.05$  and  $P < 0.01$  ( $t$ -test). Data = mean  $\pm$  SD ( $n = 3$ ).

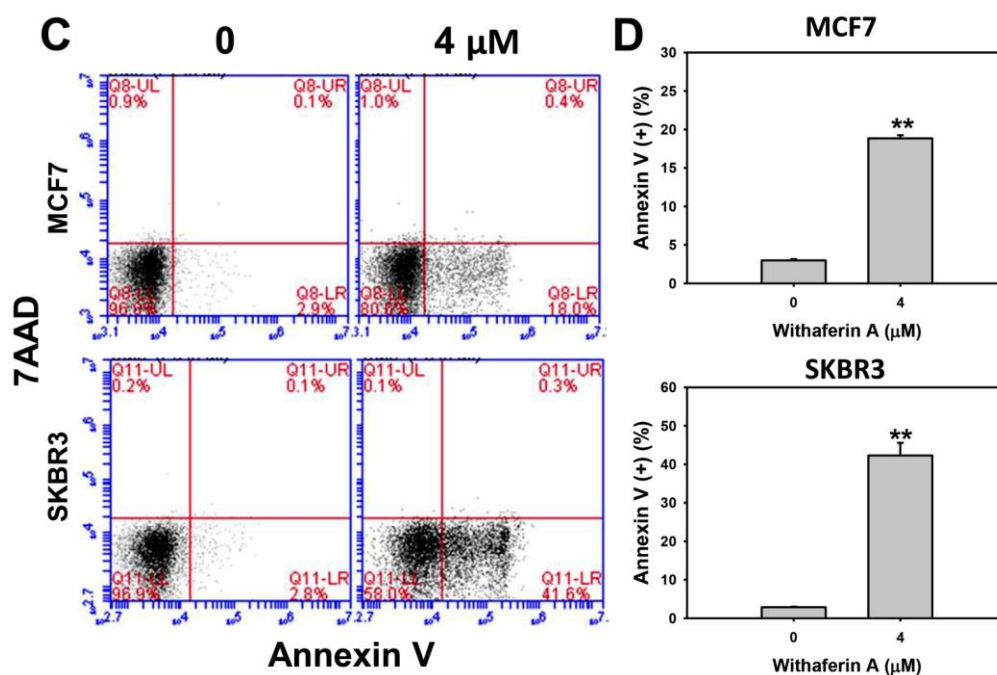

**Figure 2S-CD.** Positive control patterns for apoptosis. (C) Flow cytometry pattern. (D) Statistics. Cells (MCF7 and SKBR3) were treated with withaferin A (WFA) (4  $\mu\text{M}$ ) for 24 h. \*\* indicates  $P < 0.01$  ( $t$ -test). Data = mean  $\pm$  SD ( $n = 3$ ).

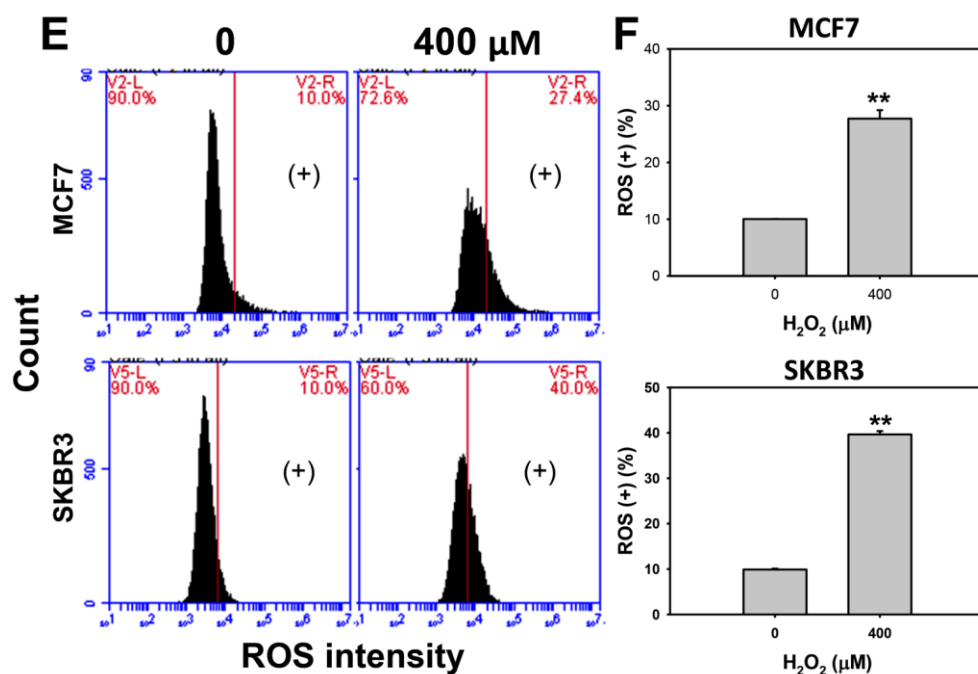

**Figure 2S-EF.** Positive control patterns for ROS analysis. (E) Flow cytometry pattern. (F) Statistics. Cells (MCF7 and SKBR3) were treated with H<sub>2</sub>O<sub>2</sub> (400 μM) for 3 h. \*\* indicates  $P < 0.01$  ( $t$ -test). Data = mean  $\pm$  SD ( $n = 3$ ).

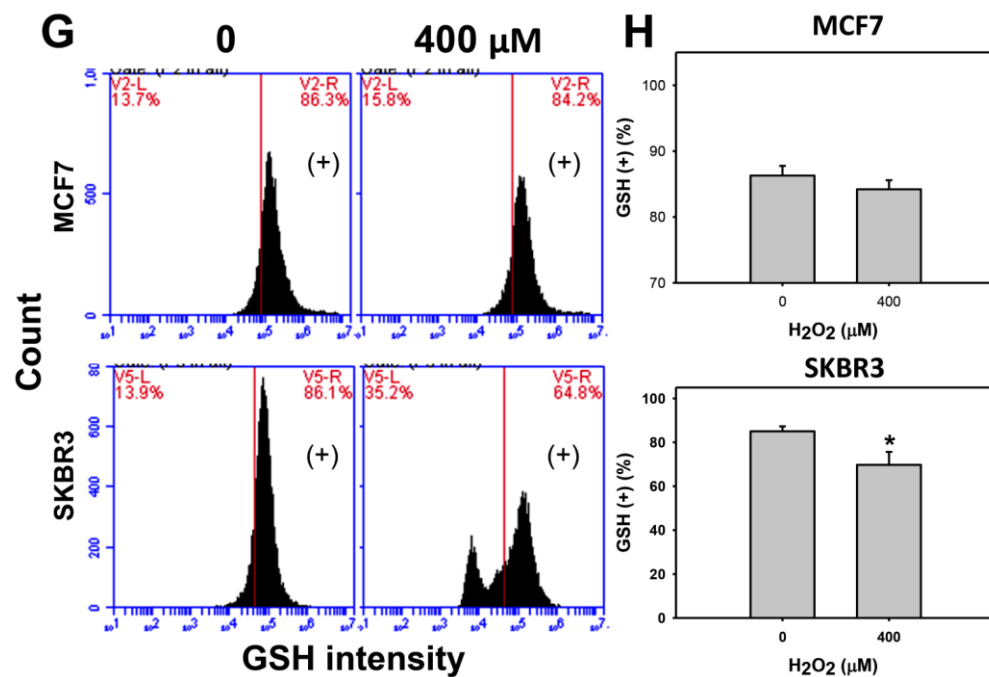

**Figure 2S-GH.** Positive control patterns for GSH analysis. (G) Flow cytometry pattern. (H) Statistics. Cells (MCF7 and SKBR3) were treated with H<sub>2</sub>O<sub>2</sub> (400 μM) for 24 h. \* indicates  $P < 0.05$  ( $t$ -test). Data = mean  $\pm$  SD ( $n = 3$ ).

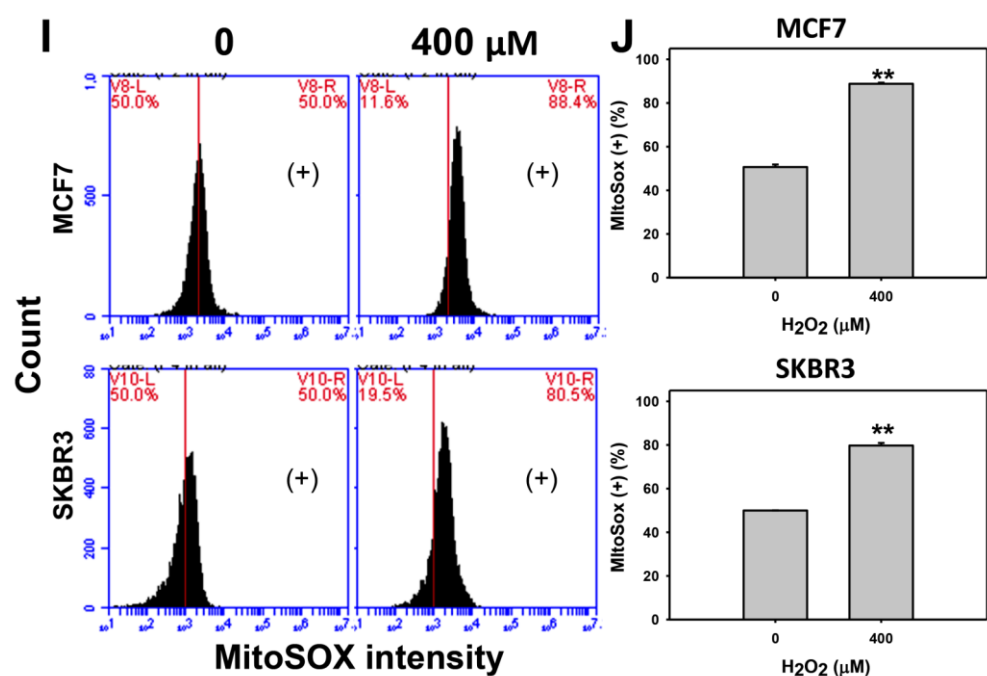

**Figure 2S-IJ.** Positive control patterns for MitoSOX analysis. (I) Flow cytometry pattern. (J) Statistics. Cells (MCF7 and SKBR3) were treated with H<sub>2</sub>O<sub>2</sub> (400  $\mu\text{M}$ ) for 24 h. \*\* indicates  $P < 0.01$  ( $t$ -test). Data = mean  $\pm$  SD ( $n = 3$ ).

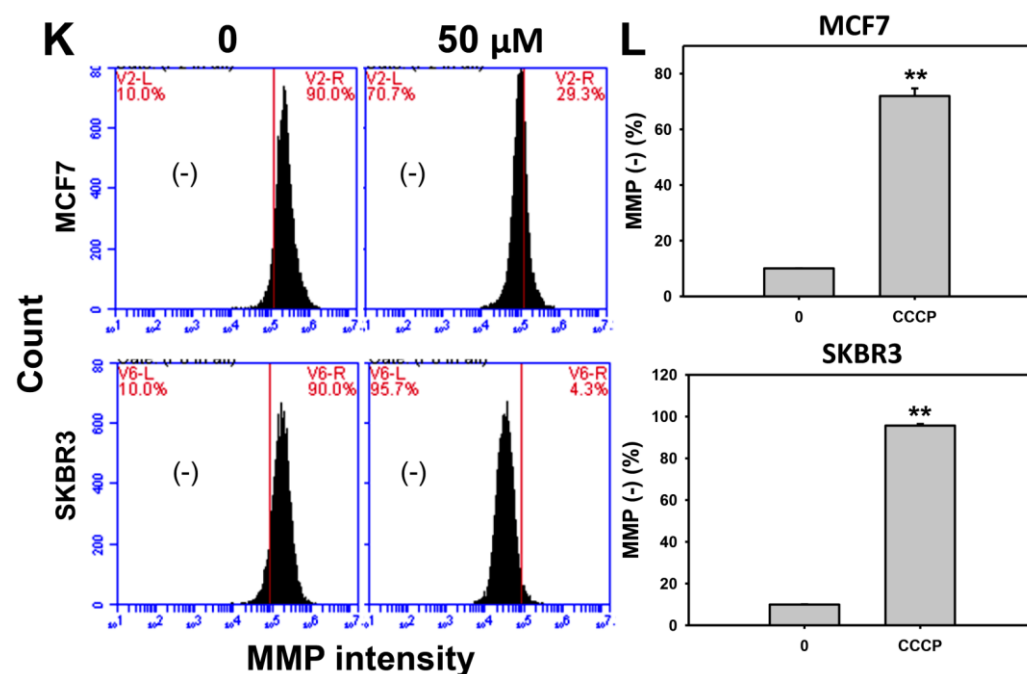

**Figure 2S-KL.** Positive control patterns for MMP analysis. (K) Flow cytometry pattern. (L) Statistics. Cells (MCF7 and SKBR3) were treated with carbonyl cyanide *m*-chlorophenyl hydrazone (CCCP) (50  $\mu\text{M}$ ) for 24 h. \*\* indicates  $P < 0.01$  ( $t$ -test). Data = mean  $\pm$  SD ( $n = 3$ ).

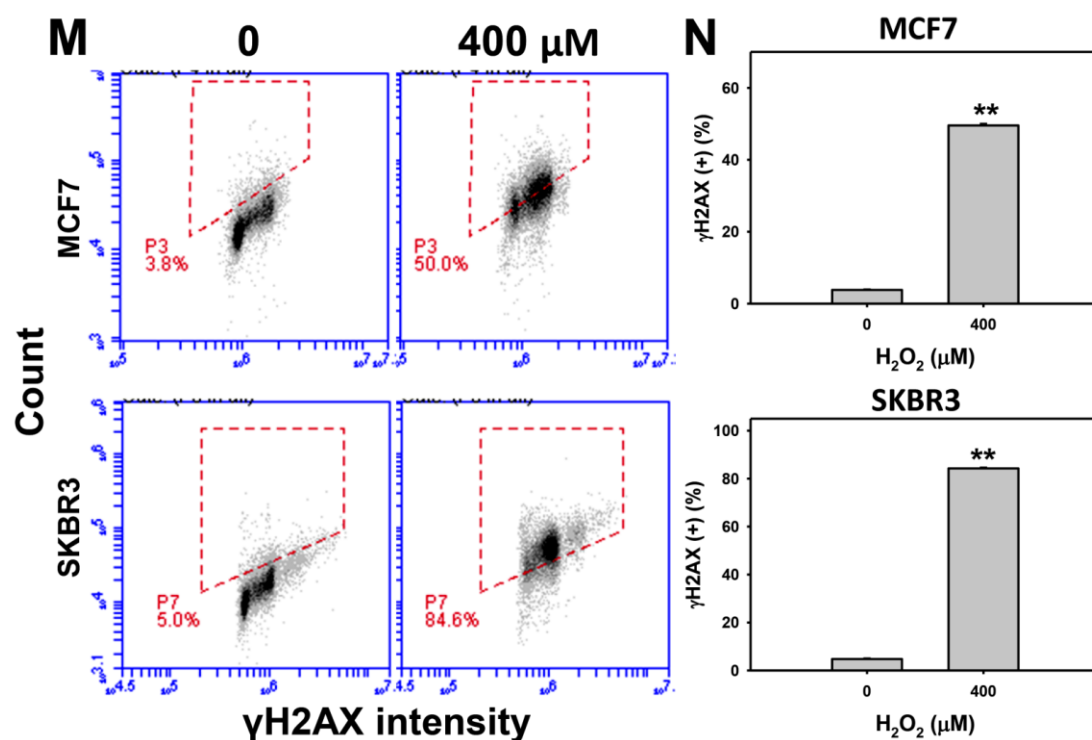

**Figure 2S-MN.** Positive control patterns for  $\gamma\text{H2AX}$  analysis. (M) Flow cytometry pattern. (N) Statistics. Cells (MCF7 and SKBR3) were treated with  $\text{H}_2\text{O}_2$  (400  $\mu\text{M}$ ) for 24 h. \*\* indicates  $P < 0.01$  ( $t$ -test). Data = mean  $\pm$  SD ( $n = 3$ ).

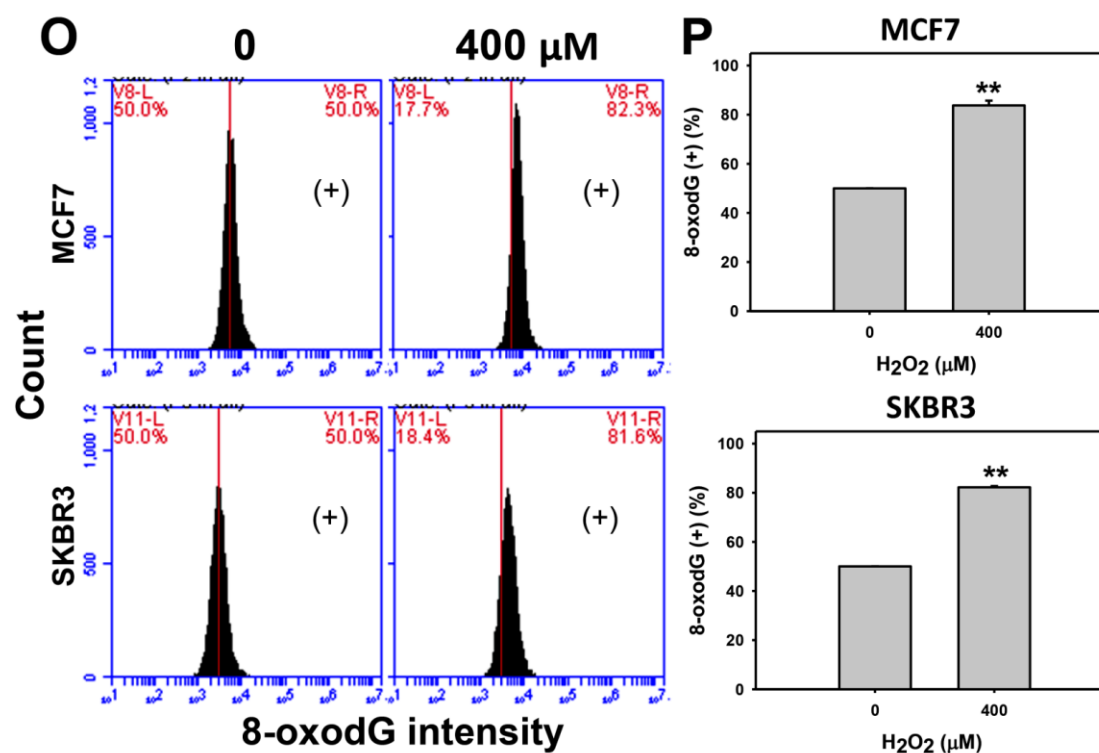

**Figure 2S-OP.** Positive control patterns for 8-oxodG analysis. (O) Flow cytometry pattern. (P) Statistics. Cells (MCF7 and SKBR3) were treated with  $\text{H}_2\text{O}_2$  (400  $\mu\text{M}$ ) for 24 h. \*\* indicates  $P < 0.01$  ( $t$ -test). Data = mean  $\pm$  SD ( $n = 3$ ).
