# Supplementary material for: Antiproliferation for Breast Cancer Cells by Ethyl Acetate Extract of Nepenthes thorellii x (ventricosa x maxima)
Source: MDPI journal article supplement (doi:10.3390/ijms20133238), 2019-07-01
Supplement: s1 [file s1]

**Supplementary Table 1.** The HPLC method for fingerprint profile of *Nepenthes thorellii* x (*ventricosa* x *maxima*).

|                  |                                                                                                                                                                                                                                                                                                                                                                                                                                                                                                                                                                                             |            |        |        |        |       |   |      |       |        |    |   |       |       |        |     |   |       |       |        |     |   |       |       |        |    |   |       |       |        |    |   |       |            |      |  |
|------------------|---------------------------------------------------------------------------------------------------------------------------------------------------------------------------------------------------------------------------------------------------------------------------------------------------------------------------------------------------------------------------------------------------------------------------------------------------------------------------------------------------------------------------------------------------------------------------------------------|------------|--------|--------|--------|-------|---|------|-------|--------|----|---|-------|-------|--------|-----|---|-------|-------|--------|-----|---|-------|-------|--------|----|---|-------|-------|--------|----|---|-------|------------|------|--|
| HPLC             | Shimadzu SIL-10AD <i>VP</i> auto injector<br>Shimadzu LC-20AD prominence liquid chromatograph<br>Shimadzu SPD-M10A <i>VP</i> diode array detector                                                                                                                                                                                                                                                                                                                                                                                                                                           |            |        |        |        |       |   |      |       |        |    |   |       |       |        |     |   |       |       |        |     |   |       |       |        |    |   |       |       |        |    |   |       |            |      |  |
| Solid phase      | Phenomenex Luna 5 μ C18(2) 100A<br>250*4.60 mm, 5 μ<br>P/NO 00G-4252-E0                                                                                                                                                                                                                                                                                                                                                                                                                                                                                                                     |            |        |        |        |       |   |      |       |        |    |   |       |       |        |     |   |       |       |        |     |   |       |       |        |    |   |       |       |        |    |   |       |            |      |  |
| Mobile phase     | A: 0.1% TFA <sub>(aq)</sub><br>B: ACN<br><table><tr><td></td><td>Time</td><td>Module</td><td>Action</td><td>Value</td></tr><tr><td>1</td><td>0.10</td><td>Pumps</td><td>B.Conc</td><td>20</td></tr><tr><td>2</td><td>60.00</td><td>Pumps</td><td>B.Conc</td><td>100</td></tr><tr><td>3</td><td>70.00</td><td>Pumps</td><td>B.Conc</td><td>100</td></tr><tr><td>4</td><td>80.00</td><td>Pumps</td><td>B.Conc</td><td>20</td></tr><tr><td>5</td><td>90.00</td><td>Pumps</td><td>B.Conc</td><td>20</td></tr><tr><td>6</td><td>90.00</td><td>Controller</td><td>Stop</td><td></td></tr></table> |            | Time   | Module | Action | Value | 1 | 0.10 | Pumps | B.Conc | 20 | 2 | 60.00 | Pumps | B.Conc | 100 | 3 | 70.00 | Pumps | B.Conc | 100 | 4 | 80.00 | Pumps | B.Conc | 20 | 5 | 90.00 | Pumps | B.Conc | 20 | 6 | 90.00 | Controller | Stop |  |
|                  | Time                                                                                                                                                                                                                                                                                                                                                                                                                                                                                                                                                                                        | Module     | Action | Value  |        |       |   |      |       |        |    |   |       |       |        |     |   |       |       |        |     |   |       |       |        |    |   |       |       |        |    |   |       |            |      |  |
| 1                | 0.10                                                                                                                                                                                                                                                                                                                                                                                                                                                                                                                                                                                        | Pumps      | B.Conc | 20     |        |       |   |      |       |        |    |   |       |       |        |     |   |       |       |        |     |   |       |       |        |    |   |       |       |        |    |   |       |            |      |  |
| 2                | 60.00                                                                                                                                                                                                                                                                                                                                                                                                                                                                                                                                                                                       | Pumps      | B.Conc | 100    |        |       |   |      |       |        |    |   |       |       |        |     |   |       |       |        |     |   |       |       |        |    |   |       |       |        |    |   |       |            |      |  |
| 3                | 70.00                                                                                                                                                                                                                                                                                                                                                                                                                                                                                                                                                                                       | Pumps      | B.Conc | 100    |        |       |   |      |       |        |    |   |       |       |        |     |   |       |       |        |     |   |       |       |        |    |   |       |       |        |    |   |       |            |      |  |
| 4                | 80.00                                                                                                                                                                                                                                                                                                                                                                                                                                                                                                                                                                                       | Pumps      | B.Conc | 20     |        |       |   |      |       |        |    |   |       |       |        |     |   |       |       |        |     |   |       |       |        |    |   |       |       |        |    |   |       |            |      |  |
| 5                | 90.00                                                                                                                                                                                                                                                                                                                                                                                                                                                                                                                                                                                       | Pumps      | B.Conc | 20     |        |       |   |      |       |        |    |   |       |       |        |     |   |       |       |        |     |   |       |       |        |    |   |       |       |        |    |   |       |            |      |  |
| 6                | 90.00                                                                                                                                                                                                                                                                                                                                                                                                                                                                                                                                                                                       | Controller | Stop   |        |        |       |   |      |       |        |    |   |       |       |        |     |   |       |       |        |     |   |       |       |        |    |   |       |       |        |    |   |       |            |      |  |
| Flow rate        | 1 mL/min                                                                                                                                                                                                                                                                                                                                                                                                                                                                                                                                                                                    |            |        |        |        |       |   |      |       |        |    |   |       |       |        |     |   |       |       |        |     |   |       |       |        |    |   |       |       |        |    |   |       |            |      |  |
| Analysis time    | 60 mins                                                                                                                                                                                                                                                                                                                                                                                                                                                                                                                                                                                     |            |        |        |        |       |   |      |       |        |    |   |       |       |        |     |   |       |       |        |     |   |       |       |        |    |   |       |       |        |    |   |       |            |      |  |
| Pressure         | 112 kgf (20% ACN <sub>(aq)</sub> )                                                                                                                                                                                                                                                                                                                                                                                                                                                                                                                                                          |            |        |        |        |       |   |      |       |        |    |   |       |       |        |     |   |       |       |        |     |   |       |       |        |    |   |       |       |        |    |   |       |            |      |  |
| Injection volume | 50 μL                                                                                                                                                                                                                                                                                                                                                                                                                                                                                                                                                                                       |            |        |        |        |       |   |      |       |        |    |   |       |       |        |     |   |       |       |        |     |   |       |       |        |    |   |       |       |        |    |   |       |            |      |  |
| Sample           | EANT (1 mg/mL, in MeOH)<br>plumbagin (1 mg/mL, in MeOH)<br><i>cis</i> -Isoshinanolone (1 mg/mL, in MeOH)<br>Quercetin 3-O-(6"-n-butyl β-D-glucuronide) (1 mg/mL, in MeOH)                                                                                                                                                                                                                                                                                                                                                                                                                   |            |        |        |        |       |   |      |       |        |    |   |       |       |        |     |   |       |       |        |     |   |       |       |        |    |   |       |       |        |    |   |       |            |      |  |
| Wavelength       | 210 nm, 254 nm                                                                                                                                                                                                                                                                                                                                                                                                                                                                                                                                                                              |            |        |        |        |       |   |      |       |        |    |   |       |       |        |     |   |       |       |        |     |   |       |       |        |    |   |       |       |        |    |   |       |            |      |  |
