# Supplementary material for: Antiproliferation for Breast Cancer Cells by Ethyl Acetate Extract of Nepenthes thorellii x (ventricosa x maxima)
Source: MDPI journal article supplement (doi:10.3390/ijms20133238), 2019-07-01

**Supplementary Figure 1. Components of EANT.** (A) Fingerprint profile of EANT. It is monitored at 365 nm. (B) Retention time of plumbagin (NT-A). Volume is 50  $\mu$ L. It is monitored at 400 nm. (C) Retention time of *cis*-isoshinanolone (NT-B). Volume is 10  $\mu$ L. It is monitored at 254 nm. (D) Retention time of quercetin 3-*O*-(6''-*n*-butyl  $\beta$ -D-glucuronide) (NT-E). Volume is 10  $\mu$ L. It is monitored at 254 nm. UV patterns were inserted in right side for the Supplementary Figures 1B, 1C and 1D.

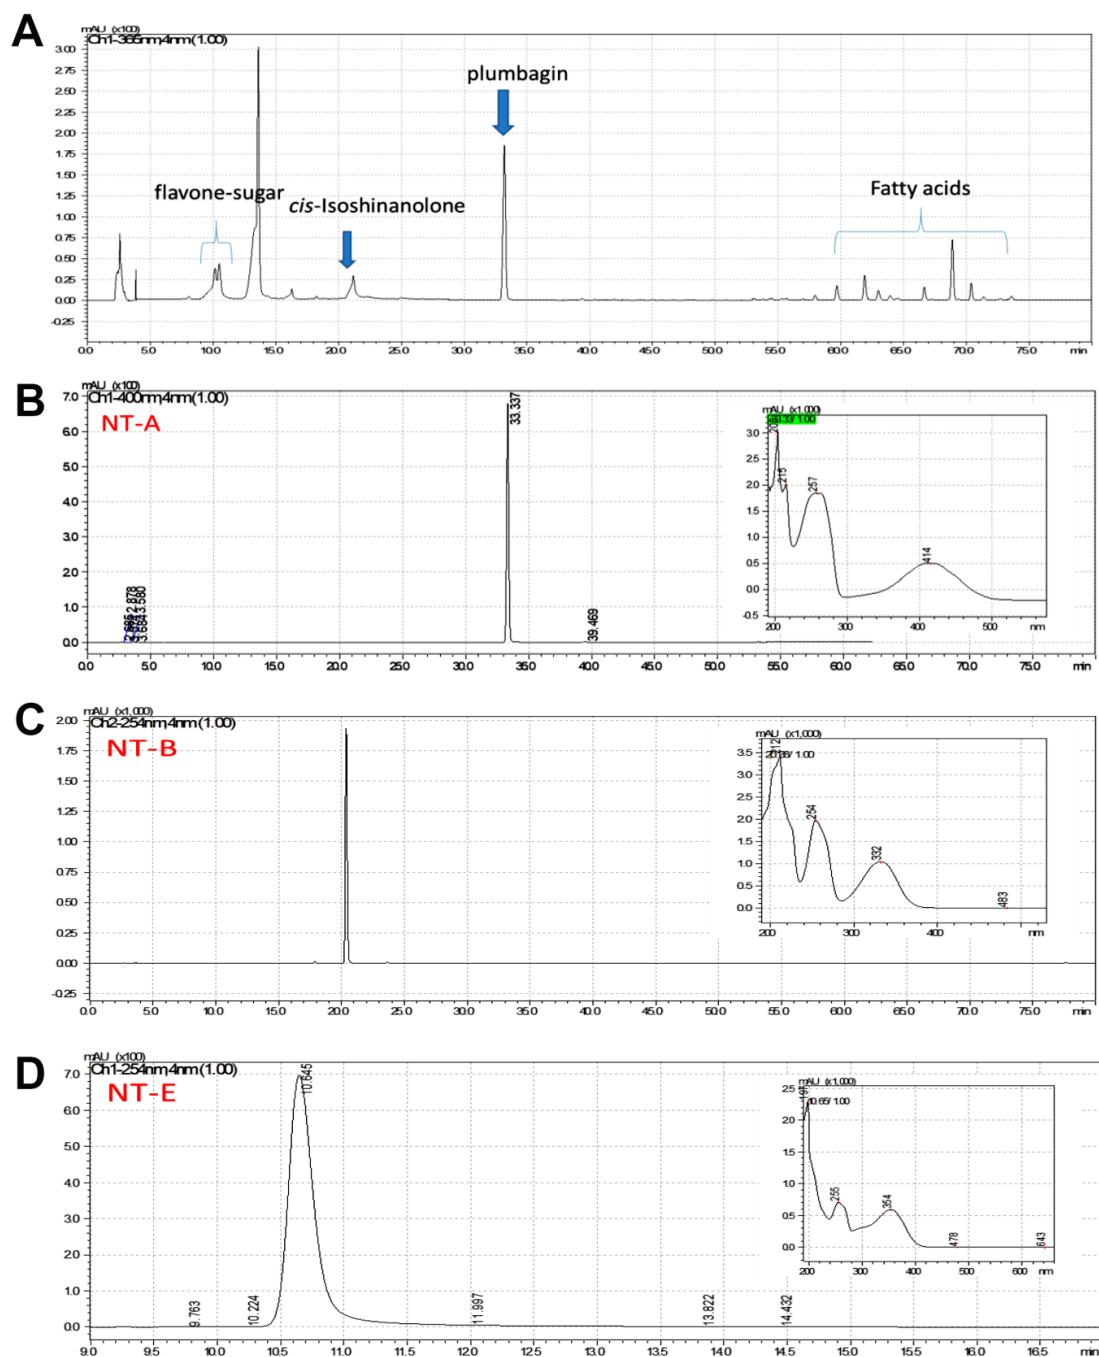

Supplement: s1 [file s1]
